# Supplementary material for: It’s positive to be negative: Achilles tendon work loops during human locomotion
Source: PLOS journal article supplement (doi:10.1371/journal.pone.0179976), 2017-07-03
Supplement: S1 (10.1371/journal.pone.0179976.s001) [file journal.pone.0179976.s001]

## Electronic Supplementary Materials – File List

Subject-specific data used to create work loop figures and results in the manuscript are provided in the following CSV files. Measurement units are denoted in square brackets. Each column in the CSV file represents mean data from a single subject. Sagittal plane ankle moment and tendon length change data represent 0 to 100% of a stride, where 0% corresponds to toe-off (i.e., the beginning of swing phase).

| Filename                                           | Description                                                       | Units   |
|----------------------------------------------------|-------------------------------------------------------------------|---------|
| <i>Data from Direct MTJ trials</i>                 |                                                                   |         |
| direct_mtj_ankle_moments_0p75.csv                  | Sagittal plane ankle moments for each subject at 0.75 m/s         | [Nm/kg] |
| direct_mtj_ankle_moments_1p00.csv                  | Sagittal plane ankle moments for each subject at 1.00 m/s         | [Nm/kg] |
| direct_mtj_ankle_moments_1p25.csv                  | Sagittal plane ankle moments for each subject at 1.25 m/s         | [Nm/kg] |
| direct_mtj_tendon_length_0p75.csv                  | Tendon length change based on Direct MTJ method, at 0.75 m/s      | [mm]    |
| direct_mtj_tendon_length_1p00.csv                  | Tendon length change based on Direct MTJ method, at 1.00 m/s      | [mm]    |
| direct_mtj_tendon_length_1p25.csv                  | Tendon length change based on Direct MTJ method, at 1.25 m/s      | [mm]    |
| <i>Data from Direct Tendon trials</i>              |                                                                   |         |
| direct_tendon_ankle_moments_0p75.csv               | Sagittal plane ankle moments for each subject at 0.75 m/s         | [Nm/kg] |
| direct_tendon_ankle_moments_1p00.csv               | Sagittal plane ankle moments for each subject at 1.00 m/s         | [Nm/kg] |
| direct_tendon_ankle_moments_1p25.csv               | Sagittal plane ankle moments for each subject at 1.25 m/s         | [Nm/kg] |
| direct_tendon_tendon_length_0p75.csv               | Tendon length change based on Direct Tendon method, at 0.75 m/s   | [mm]    |
| direct_tendon_tendon_length_1p00.csv               | Tendon length change based on Direct Tendon method, at 1.00 m/s   | [mm]    |
| direct_tendon_tendon_length_1p25.csv               | Tendon length change based on Direct Tendon method, at 1.25 m/s   | [mm]    |
| <i>Anthropometric data pertinent to all trials</i> |                                                                   |         |
| moment_arms.csv                                    | Achilles tendon moment arm about the ankle joint (sagittal plane) | [m]     |
